# Supplementary material for: Inhibition of microRNA-494-3p activates Wnt signaling and reduces proinflammatory macrophage polarization in atherosclerosis
Source: PubMed Central journal article supplement (PMC8607137; doi:10.1016/j.omtn.2021.10.027), 2021-11-04
Supplement: mmc1.pdf [file mmc1.pdf]

**Supplemental information**

**Inhibition of microRNA-494-3p activates Wnt  
signaling and reduces proinflammatory  
macrophage polarization in atherosclerosis**

**Eva van Ingen, Amanda C. Foks, Tamar Woudenberg, M. Leontien van der Bent, Alwin de Jong, Philipp J. Hohensinner, Johann Wojta, Ilze Bot, Paul.H.A. Quax, and Anne Yaël Nossent**

## Supplemental Data

**Table 1. Primer sequences**

| <b>Wnt signaling</b> |                         |
|----------------------|-------------------------|
| CTNNB1-HSA-FW        | CTTGGCTATTACGACAGACTGC  |
| CTNNB1-HSA-RV        | ATTTACTAAAGCTTGGGGTCCA  |
| CCND1-HSA-FW         | GGAGACCATCCCCCTGAC      |
| CCND1-HSA-RV         | CCACTTGAGCTTGTTACCA     |
| STAT3-HSA-FW         | GTGACAGCTTCCCAATGGAG    |
| STAT3-HSA-RV         | AACACCAAAGTGGCATGTGA    |
| FZD2-HSA-FW          | CCCGACTTCACGGTCTACAT    |
| FZD2-HSA-RV          | TCCACGAGTGCAGCGTCT      |
| PYGO1-HSA-FW         | AGGTGTACAACACTAGGAAGCCC |
| PYGO1-HSA-RV         | TTTGGATTTCGGTGGTGGAGC   |
| TBL1X -HSA-FW        | TGGATCCTTCGACAAGTGCG    |
| TBL1X -HSA-RV        | GTTCCAGCACACCTCGAAGA    |
| TCF7L2 -HSA-FW       | AGGAGGATTCAGACACCCCT    |
| TCF7L2 -HSA-RV       | CCGTCGTGTGTAGCGTATGA    |
| ACVR1C-HSA-FW        | CTGTTGGTCTGGTTTACTGGGA  |
| ACVR1C-HSA-RV        | ATCGAGGGATCTGAAGGCAC    |
| WNT5A-HSA-FW         | GCCAGTATCAATTCCGACATCG  |
| WNT5A-HSA-RV         | TCACCGCGTATGTGAAGGC     |
|                      |                         |
| <b>Cholesterol</b>   |                         |
| HMGCS1-HSA-FW        | GGCGTCCCCTCCAAATGAT     |
| HMGCS1-HSA-RV        | GTGGCAGGGAGTCTTGGTAC    |
|                      |                         |
| <b>Polarization</b>  |                         |
| CD80-HSA-FW          | ACCTGGCTGAAGTGACGTTA    |
| CD80-HSA-RV          | TCCAGAGGTTGAGCAAATTATCC |
| CD86-HSA-FW          | TTCCCTGATGTTACGAGCAAT   |
| CD86-HSA-RV          | CCAAGGAATGTGGTCTGGGG    |
| CD206-HSA-FW         | TCGGGTTTATGGAGCAGGTG    |
| CD206-HSA-RV         | TGAACGGGAATGCACAGGTT    |
| IL1B-HSA-FW          | AGCTACGAATCTCCGACCAC    |
| IL1B-HSA-RV          | CGTTATCCCATGTGTGCGAAGAA |
| CXCL9-HSA-FW         | CCAGTAGTGAGAAAGGGTTCG   |
| CXCL9-HSA-RV         | AGGGCTTGGGGCAAATTGTT    |
| CD163-HSA-FW         | TTTGTCAACTTGAGTCCCTTAC  |
| CD163-HSA-RV         | TCCCGCTACACTTGTTTTTAC   |
| IL-10-HSA-FW         | TCAAGGCGCATGTGAACTCC    |
| IL-10-HSA-RV         | GATGTCAAACCTCACTCATGGCT |

|                     |                        |
|---------------------|------------------------|
| TREM2-HSA-FW        | GGTGGCACTCTCACCATTACG  |
| TREM2-HSA-RV        | CTCGAAGCTCTCAGACTCCC   |
| CD206-MMU-FW        | GTTCGGGATTGTGGAGCAGA   |
| CD206-MMU-RV        | ACAGACGGCTCCATTTGCAT   |
| iNOS-MMU-FW         | AGGGACAAGCCTACCCCTC    |
| iNOS-MMU-RV         | CTCATCTCCCGTCAGTTGGT   |
| Arg-1-MMU-FW        | CTCCAAGCCAAAGTCCTTAGAG |
| Arg-1-MMU-RV        | AGGAGCTGTCATTAGGGACATC |
|                     |                        |
| <b>Housekeeping</b> |                        |
| U6-MMU/HSA-FW       | AGAAGATTAGCATGGCCCCT   |
| U6-MMU/HSA-RV       | ATTTGCGTGTCATCCTTGCG   |
| GAPDH-MMU/HSA-FW    | AGAAGATTAGCATGGCCCCT   |
| GAPDH-MMU/HAS-RV    | ATTTGCGTGTCATCCTTGCG   |
| RSP18-MMU-FW        | TGCGAGTACTCAACACCAACA  |
| RSP18-MMU-RV        | GGTGAGGTCGAGTCTGCTTT   |

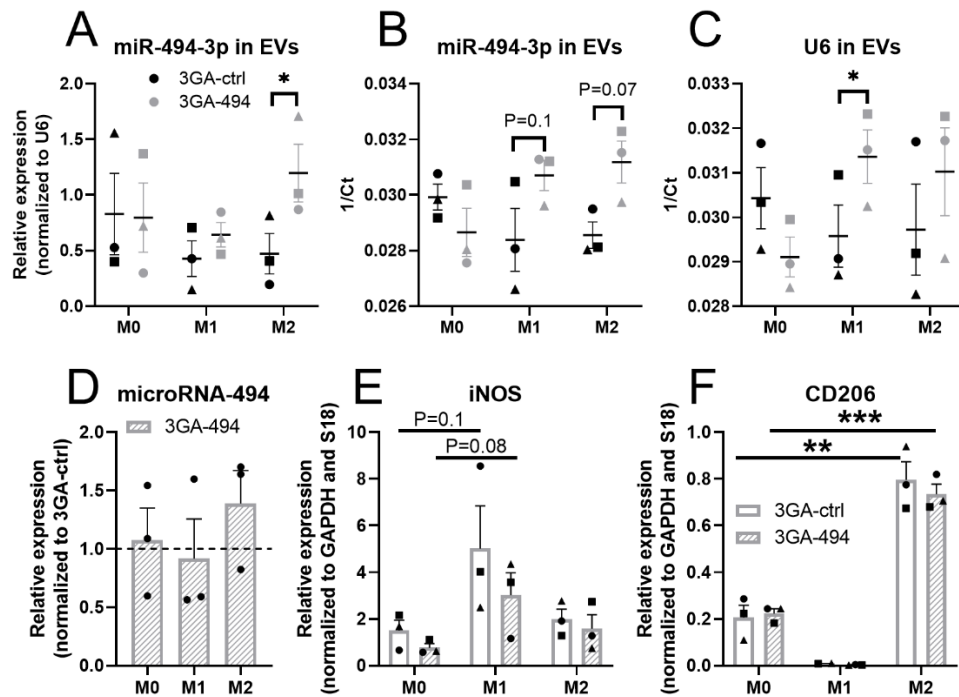

**Supplemental Figure 1. Secretion of microRNA-494-3p in human extracellular vesicles and microRNA-494-3p expression and polarization markers in murine macrophages.**

(A-C) Expression of miR-494-3p in extracellular vesicles (EVs) secreted from M0, M1 and M2 human macrophages, treated with 3GA-ctrl or 3GA-494. (A) Relative expression of miR-494-3p normalized to U6. (B) 1 divided by absolute Ct value (1/Ct) of miR-494-3p and (C) 1/Ct of U6. (D) MiR-494-3p expression in resting M0 and polarized M1 and M2 murine macrophages treated with 3GA-494, normalized to 3GA-ctrl treated M0, M1 and M2 macrophages, respectively (N=3). Expression levels were normalized to 3GA-ctrl. MiR-191 was used as a reference gene. (E) Expression levels of M1 marker inducible oxide synthase (iNOS) and (F) M2 marker cluster of differentiation 206 (CD206) in M0, M1 and M2 macrophages (N=3). A two-tailed unpaired t-test was performed to compare single treatment with the control (3GA-ctrl or M0). (D-F) GAPDH and ribosomal protein S18 were used as a reference gene. Data are represented as mean  $\pm$ SEM. \*\*\*P<0.001, \*\*P<0.01, \*P<0.05, compared to 3GA-ctrl or M0.

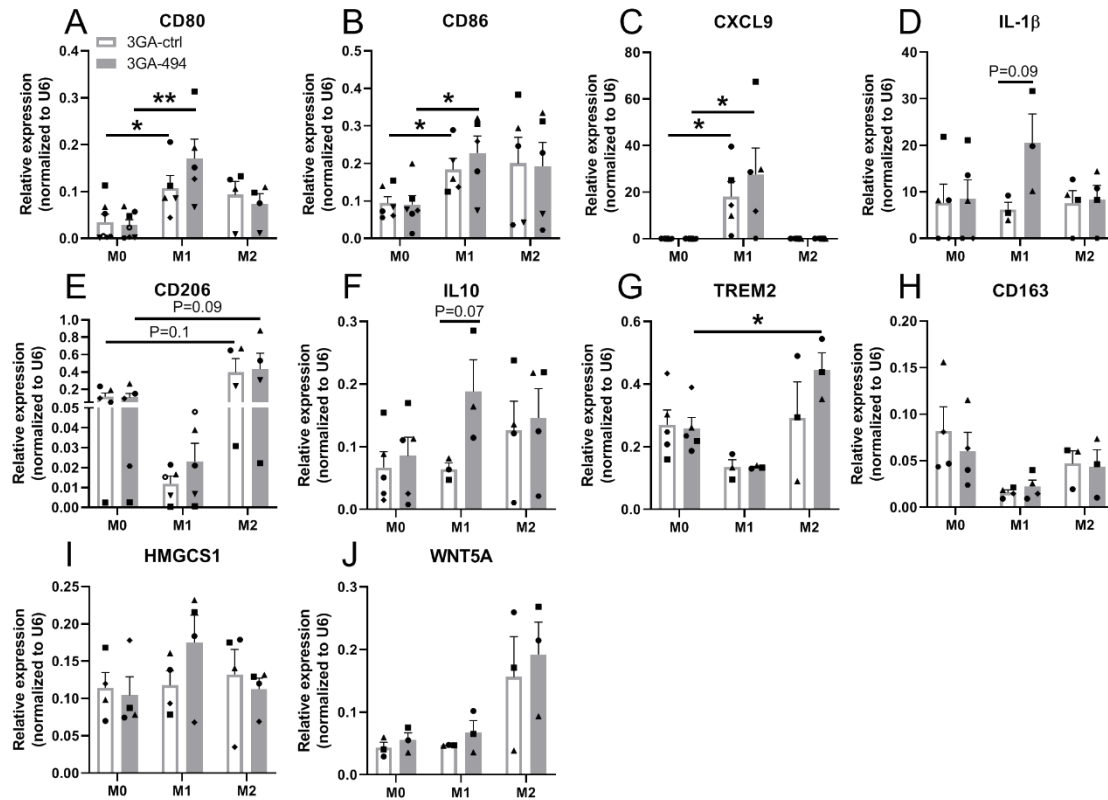

**Supplemental Figure 2. Expression of key M1 and M2 polarization markers in human macrophages treated with 3GA-494 or 3GA-ctrl.** Resting M0 and polarized M1 and M2 macrophages treated with 3GA-494 or 3GA-ctrl for 24 hours. Expression levels of M1 markers (A) cluster of differentiation (CD)80, (B) CD86, (C), chemokine ligand 9 (CXCL9) and (D) interleukin 1- $\beta$  and expression levels of M2 markers (E) CD206, (F) interleukin 10 (IL10) and (G) triggering receptor on myeloid cells 2 (TREM-2). (H) Expression of CD163, a receptor for hemoglobin-haptoglobin complexes, (I) 3-Hydroxy-3-Methylglutaryl-CoA Synthase 1 (HMGCS1) and (J) Wnt family member 5A (WNT5A). A two-tailed unpaired t-test was performed to compare single treatment with the control (3GA-ctrl or M0). N is represented by the individual symbols. Variations in N are caused by the exclusion criteria, as explained in the material and methods. U6 was used as a reference gene. Data are represented as mean  $\pm$ SEM. \*\*P<0.01, \*P<0.05, compared to 3GA-ctrl or M0.

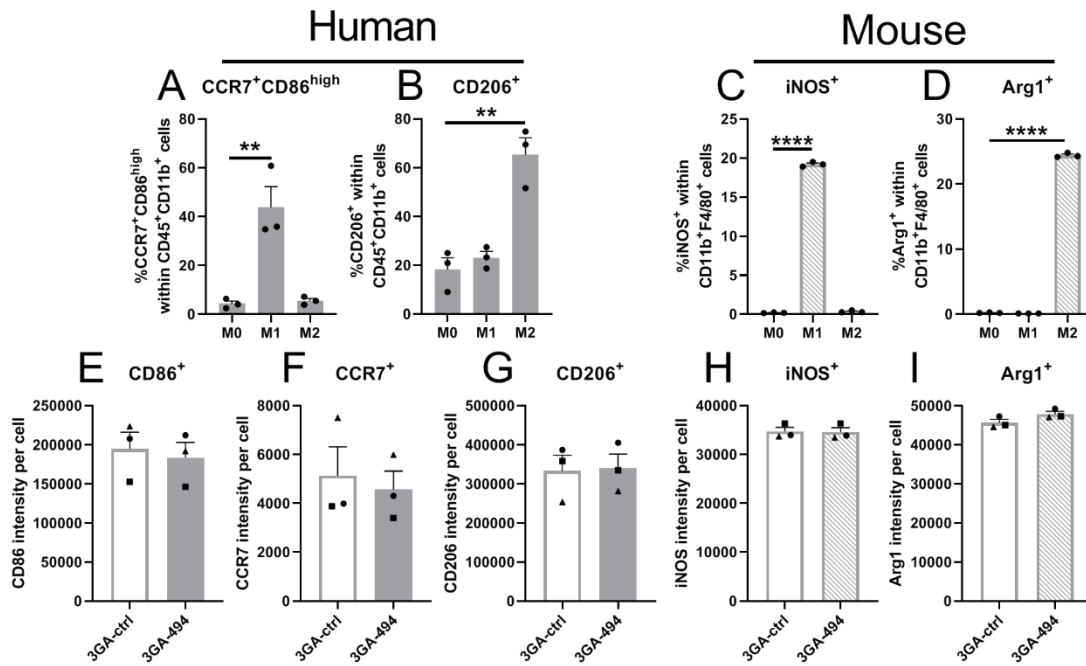

**Supplemental Figure 3. Flow cytometric analysis of M1 and M2 markers in human and murine polarized macrophages.** Protein levels of M1 and M2 markers in human and murine *in vitro* polarized macrophages (N=3). M1 polarization was induced with LPS and IFN $\gamma$ . M2 polarization was induced with IL4 and IL13. Percentage of M1 markers (A) C-C chemokine receptor 7 (CCR7) and cluster of differentiation 86 (CD86) positive cells and percentage of M2 marker (B) CD206 positive cells in human M0 and polarized M1 and M2 macrophages. Percentage of M1 marker (C) inducible oxide synthase (iNOS) positive cells and (D) percentage of M2 marker Arginase-1 (Arg1) positive cells in murine M0 and polarized M1 and M2 macrophages. (E) CD86 and (F) CCR7 mean fluorescence intensity (MFI) per cell in human M1 macrophages and (G) CD206 MFI per cell in human M2 macrophages. (H) iNOS MFI in murine M1 macrophages and (I) Arg1 MFI in murine M2 macrophages. (A-D) Percentage (%) of positive cells within alive (A and B) CD45<sup>+</sup>CD11b<sup>+</sup> or (C and D) CD11b<sup>+</sup>F4/80<sup>+</sup> cells is shown. (E-I) MFI per cell, treated with 3GA-ctrl or 3GA-494. A two-tailed unpaired t-test was performed to compare single treatment with the control (M0). Data are represented as mean  $\pm$ SEM. \*\*\*\*P<0.0001, \*\*P<0.01, compared to M0.

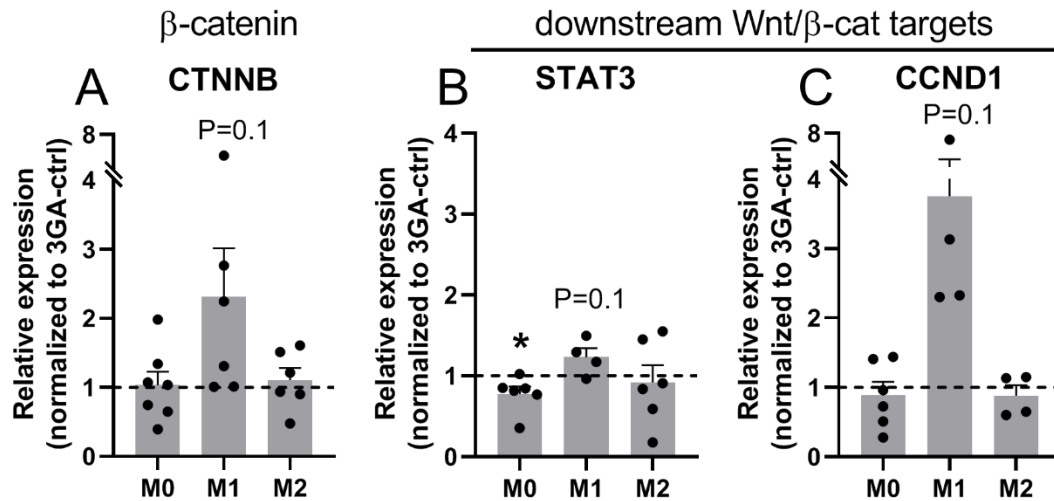

**Supplemental Figure 4. Active  $\beta$ -catenin and downstream Wnt target genes in human macrophages treated with 3GA-494 or 3GA-ctrl.** Relative expression levels of (A)  $\beta$ -catenin and two downstream Wnt transcription targets, (B) signal of transducer and activator of transcription 3 (STAT3) and (C) cyclin D1 (CCND1) in 3GA-ctrl or 3GA-494 treated M0 and polarized M1 and M2 human macrophages. Expression levels are normalized to 3GA-ctrl (1). U6 was used as a reference gene. A one-sample t-test was performed to compare single treatment with the control, within each individual donor. N is represented by the individual dots. Variations in N are caused by the exclusion criteria, as explained in the material and methods. Data are represented as mean  $\pm$ SEM. \*P<0.05, compared to 3GA-ctrl.

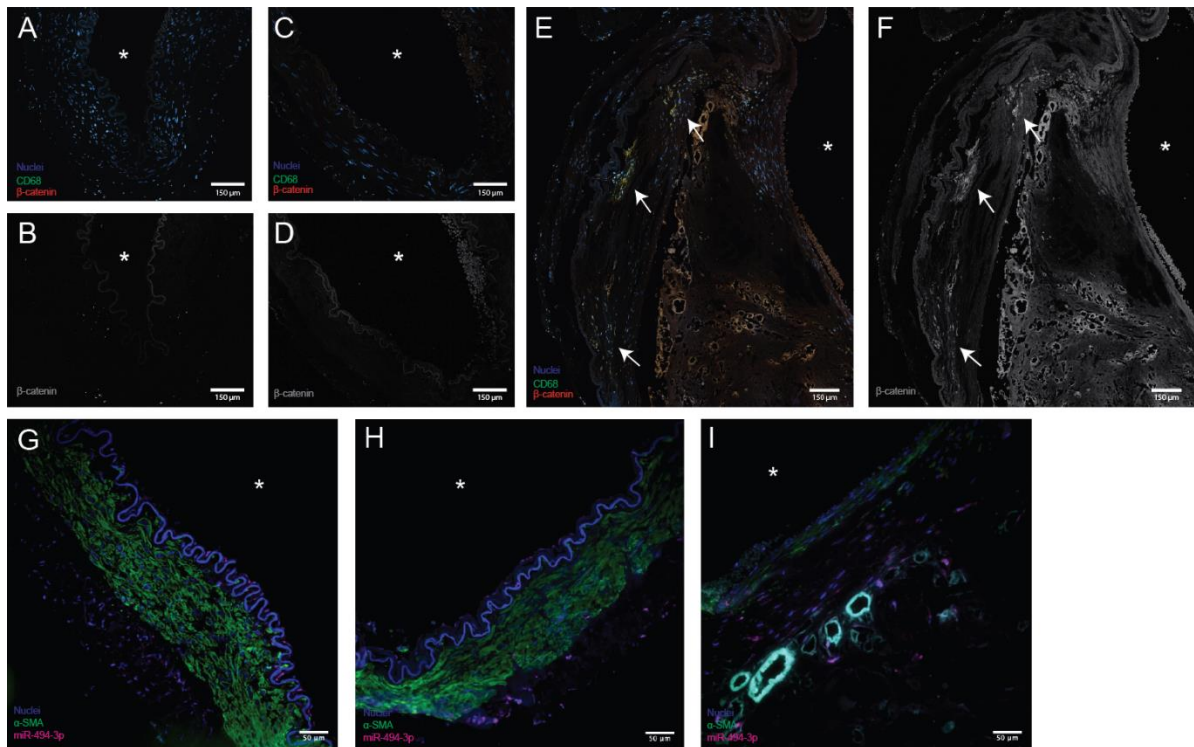

**Supplemental Figure 5. Active  $\beta$ -catenin, CD68 and miR-494-3p in human middle cerebral arteries from either a healthy, mildly atherosclerotic or severely atherosclerotic section.** (A, B) Healthy, (C,D) mildly atherosclerotic and (E,F) advanced atherosclerotic sections. (A, C, E) Sections were stained with an antibody against CD68 to stain for macrophages (green), the non-phosphorylated (non-phospho) form of  $\beta$ -catenin (red) and nuclei (blue). (B, D, F)  $\beta$ -catenin (grey) staining alone. (G) Healthy, (H) mildly atherosclerotic and (I) advanced atherosclerotic sections were stained with an antibody against  $\alpha$ -smooth muscle actin ( $\alpha$ -SMA; green) and with fluorescent in situ hybridization to stain for miR-494-3p (red). Nuclei are shown in blue. Arrows point at areas with both  $\beta$ -catenin and CD68 expression. Asterisks indicate the vessel lumen.
